# Supplementary material for: Albumin–polymer conjugate nanoparticles and their interactions with prostate cancer cells in 2D and 3D culture: comparison between PMMA and PCL
Source: Royal Society of Chemistry journal article supplement (doi:10.1039/c5tb02576a), 2016-01-01
Supplement: c5tb02576a1.pdf [file c5tb02576a1.pdf]

## Supporting Information

# Albumin-polymer conjugate nanoparticles and their interactions with prostate cancer cells in 2D and 3D culture: Degradable vs non-degradable polymers

Yanyan Jiang<sup>1</sup>, Hongxu Lu<sup>1</sup>, Aydan Dag<sup>2</sup>, Gene Hart-Smith<sup>3</sup>, Martina H. Stenzel<sup>1,\*</sup>

<sup>1</sup>Centre for Advanced Macromolecular Design (CAMD), School of Chemical Engineering and School of Chemistry, University of New South Wales, Sydney, NSW 2052, Australia

<sup>2</sup> Department of Pharmaceutical Chemistry, Faculty of Pharmacy, Bezmialem Vakif University, 34093 Fatih, Istanbul, Turkey

<sup>3</sup>Systems Biology Initiative, School of Biotechnology and Biomolecular Sciences, University of New South Wales, Sydney 2052, Australia

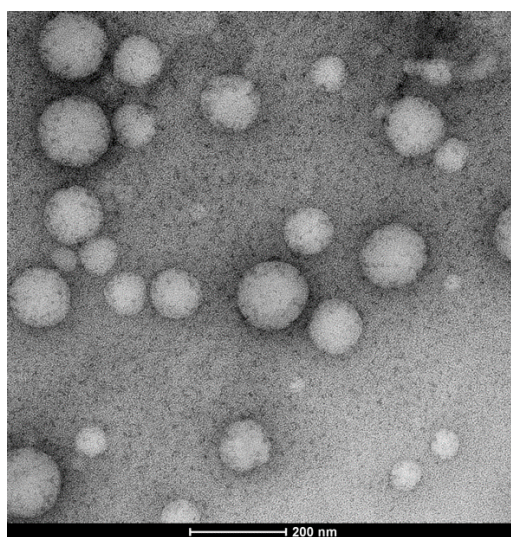

| Sample name           | Hydrodynamic diameter (nm) | PDI  |
|-----------------------|----------------------------|------|
| BSA-PMMA nanoparticle | 147±11                     | 0.35 |

*Figure S1: TEM image and the DLS information of BSA-PMMA nanoparticles.*

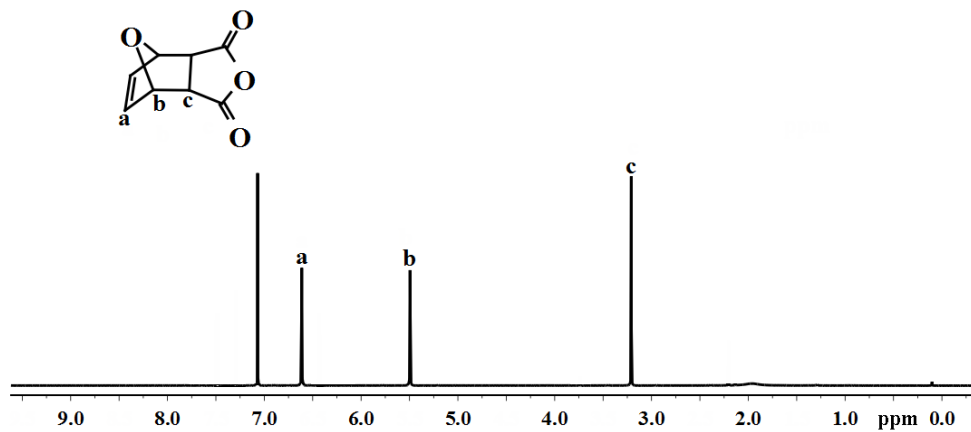

**Figure S2:** <sup>1</sup>H NMR spectrum of 4,10-dioxatricyclo[5.2.1.0<sup>2,6</sup>]dec-8-ene-3,5-dione (**1**) in CDCl<sub>3</sub>.

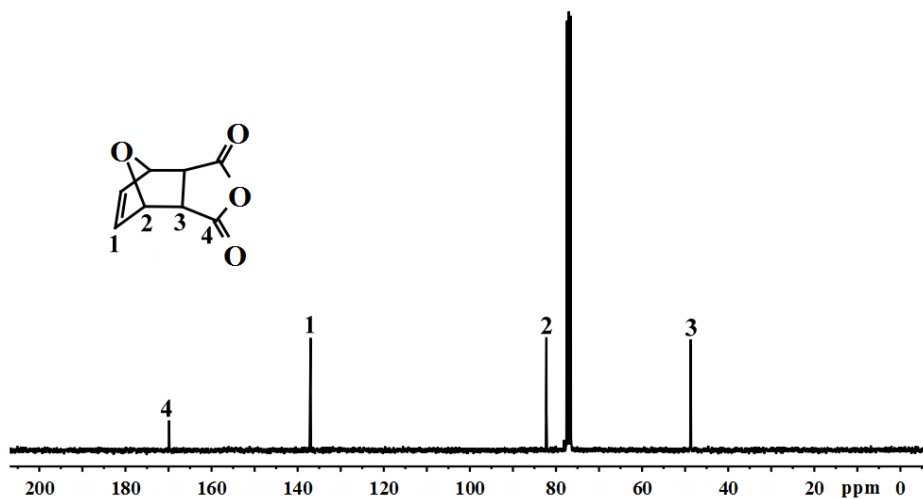

**Figure S3:** <sup>13</sup>C NMR spectrum of 4,10-dioxatricyclo[5.2.1.0<sup>2,6</sup>]dec-8-ene-3,5-dione (**1**) in CDCl<sub>3</sub>.

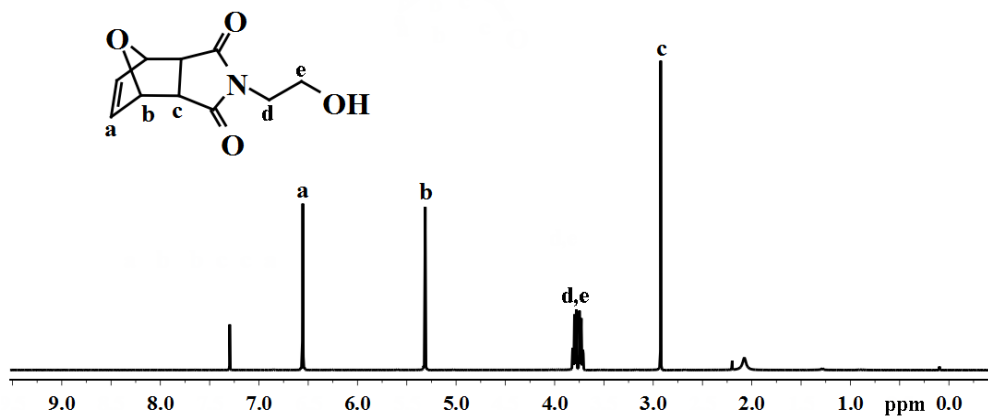

**Figure S4:**  $^1\text{H}$  NMR spectrum of 4-(2-hydroxyethyl)-10-oxa-4-azatricyclo[5.2.1.0<sup>2,6</sup>]dec-8-ene-3,5-dione (2) in  $\text{CDCl}_3$ .

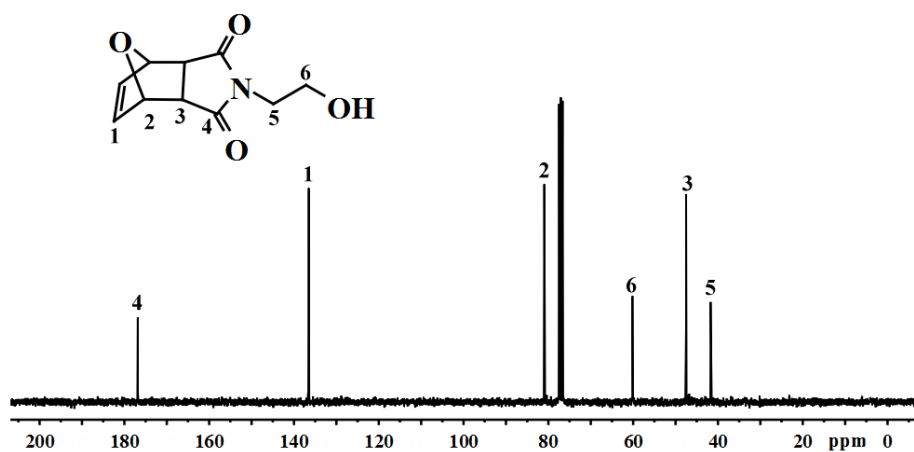

**Figure S5:**  $^{13}\text{C}$  NMR spectrum of 4-(2-hydroxyethyl)-10-oxa-4-azatricyclo[5.2.1.0<sup>2,6</sup>]dec-8-ene-3,5-dione (2) in  $\text{CDCl}_3$ .

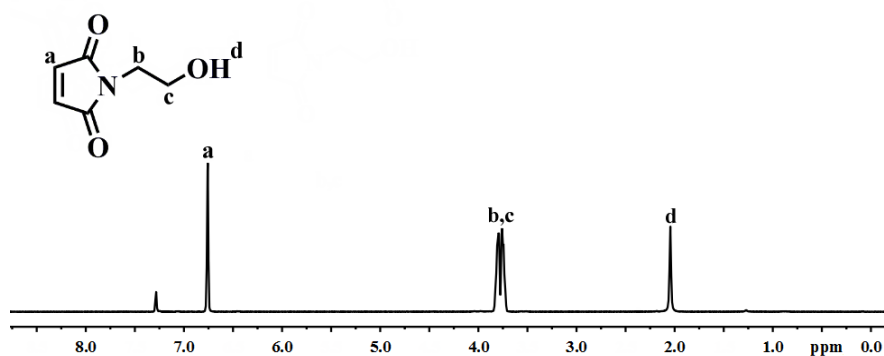

**Figure S6:**  $^1\text{H}$  NMR spectrum of 1-(2-hydroxyethyl)-1H-pyrrole-2,5-dione (3) in  $\text{CDCl}_3$ .

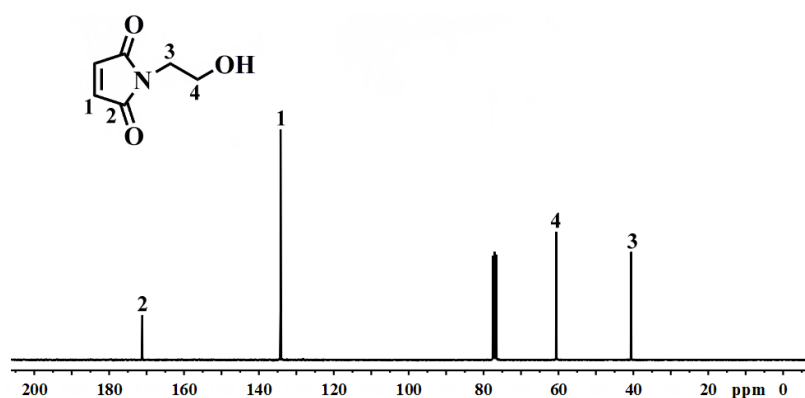

Figure S7:  $^{13}\text{C}$  NMR spectrum of 1-(2-hydroxyethyl)-1H-pyrrole-2,5-dione (3) in  $\text{CDCl}_3$ .

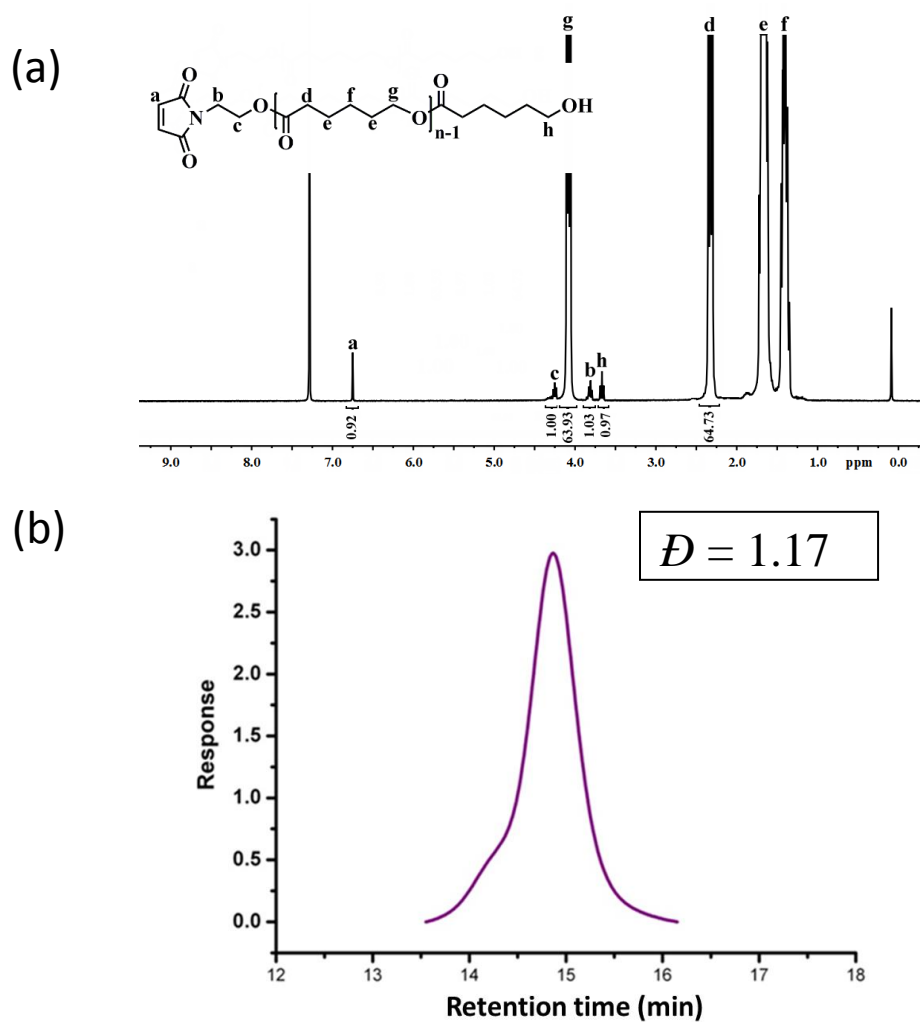

Figure S8: (a)  $^1\text{H}$  NMR ( $\text{CDCl}_3$ ) spectra of MI-PCL and (b) GPC curve.

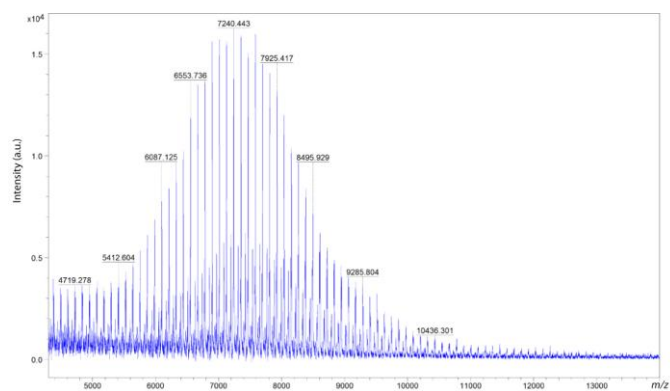

**Figure S9:** The MALDI-TOF spectrum of PCL. 2,5-Dihydroxybenzoic acid (DHB) (20 mg/mL in 70:30 acetonitrile:0.1% tetrafluoroacetic acid) was used as the matrix.

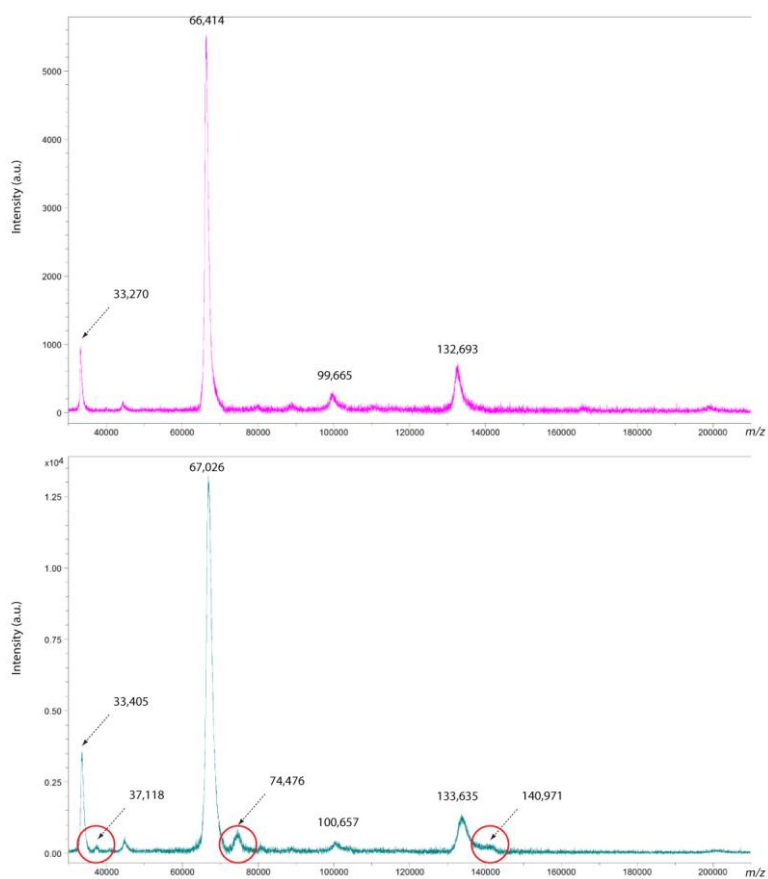

**Figure S10:** MALDI-TOF spectra of BSA (top) and the BSA-PCL conjugate mixture (bottom). 2,5-Dihydroxybenzoic acid (DHB) (20 mg/mL in 70:30 acetonitrile:0.1% tetrafluoroacetic acid) was used as the matrix. The peaks of the conjugates have been marked with red circles.

**Table S1.** The particle size of the BSA-PCL micelles with deferent treatment.

| Sample Name                           | Particle size (d. nm) | PDI  |
|---------------------------------------|-----------------------|------|
| BSA-PCL micelle blank                 | 111.23                | 0.20 |
| BSA-PCL micelle blank 5 days          | 108.49                | 0.19 |
| BSA-PCL micelle blank with trypsin    | >1000                 | 1    |
| BSA-PCL micelle blank with pancreatin | 0                     | 0    |

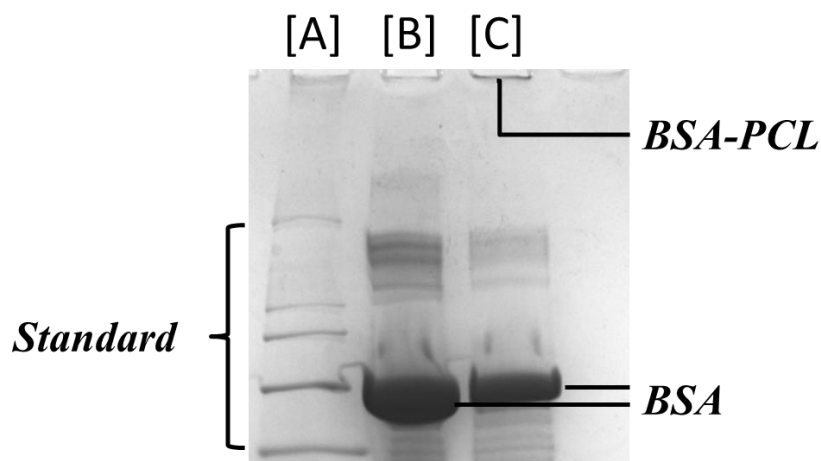

**Figure S11:** SDS-PAGE traces of the conjugation of BSA and PCL (molar ratio= 1:1). Lane [A]: protein standard. [B]: Initial BSA. [C]: BSA-PCL micelle. The amphiphilicity of the BSA-PCL conjugates prevents the diffusion of the final product, which is only visible in the well. Comparing the intensity of the BSA residual band in Lane [C] with the initial BSA band in Lane [B], around 50 % of BSA has been conjugated to the maleimide PCL.

**Table S2.** Final concentrations of inhibitors used for the cytotoxicity assay.

| <b>Inhibitor</b>                    | <b>Final concentrations</b> |
|-------------------------------------|-----------------------------|
| <b>Chorprozamine hydrochloride</b>  | 10 µg/mL                    |
| <b>Filipin</b>                      | 10 µg/mL                    |
| <b>Amiloride</b>                    | 50 µM                       |
| <b>NaN<sub>3</sub>/Deoxyglucose</b> | 5 mM/5 mM                   |

**Table S3.** Summary of inhibitor targets and mechanisms of action.

| <b>Inhibitor</b>       | <b>Targeted Pathway</b> | <b>Mechanism of Action</b>                           |
|------------------------|-------------------------|------------------------------------------------------|
| <b>Chlorpromazine</b>  | Clathrin                | Prevention of coated pit formation                   |
| <b>Filipin</b>         | Lipid Raft/Caveolae     | Binding to cholesterol causing sequestration         |
| <b>Amiloride</b>       | Macropinocytosis        | Na <sup>+</sup> /H <sup>+</sup> Exchanger inhibition |
| <b>NaN<sub>3</sub></b> | Receptor mediated       | ATP depletion                                        |

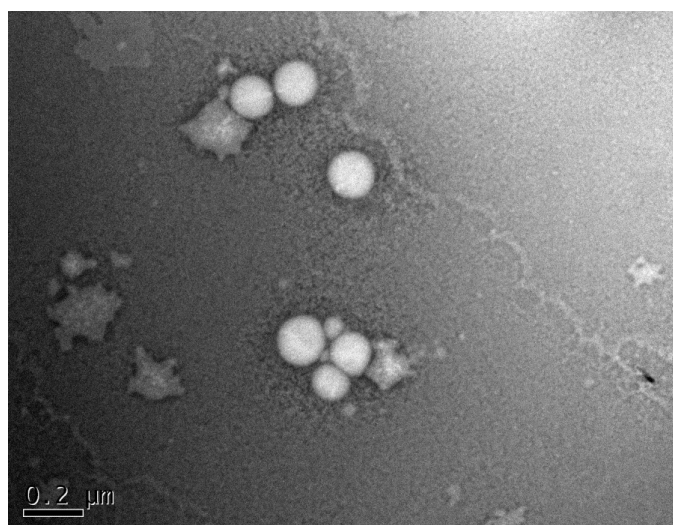

**Figure S12:** TEM image of the Nile red loaded BSA-PCL micelles.

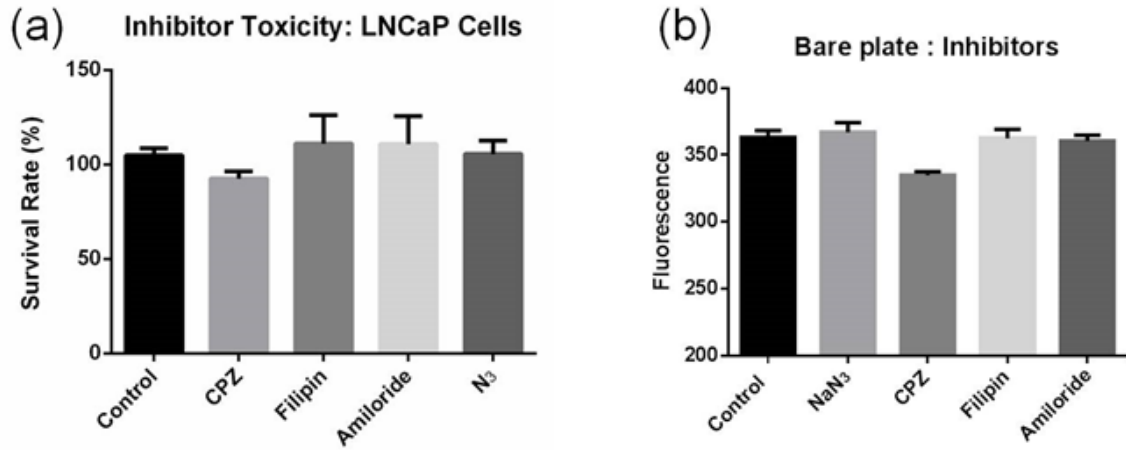

**Figure S13:** (a) Cytotoxicity test of all the four inhibitors. (b) The influence of the inhibitors on the fluorescence of the BSA-PCL micelle without cells. Data represent means  $\pm$  S.D.,  $n=4$ .

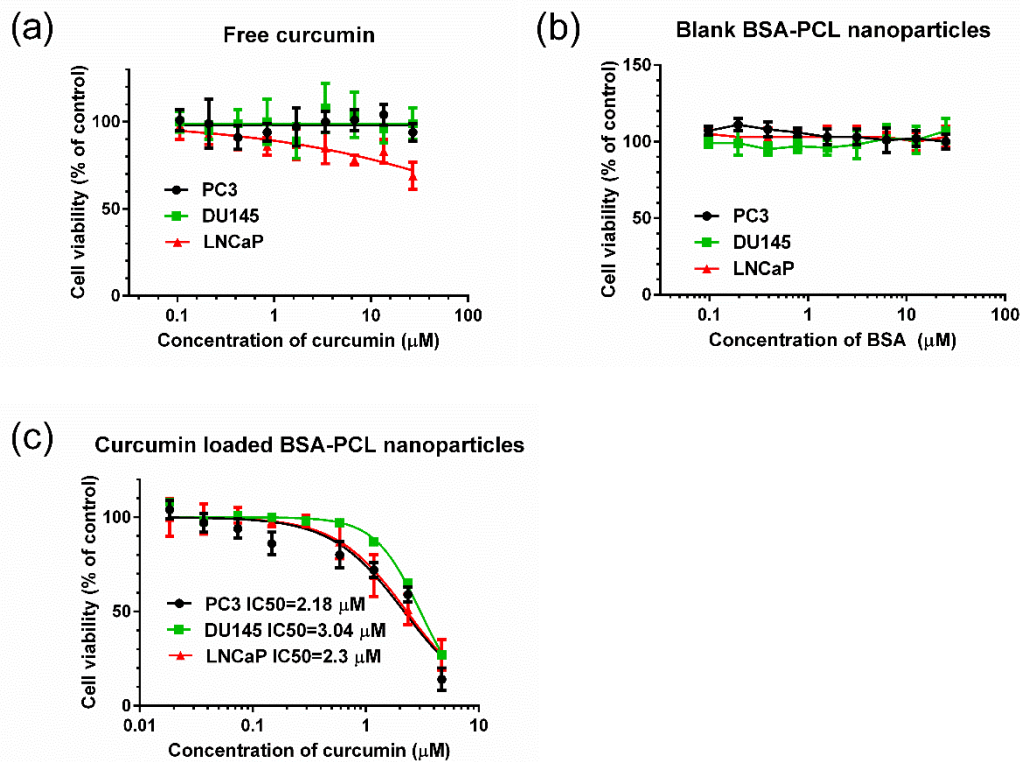

**Figure S14.** Cytotoxicity assays of (a) free curcumin, (b) blank BSA-PCL nanoparticles and (c) curcumin loaded BSA-PCL nanoparticles against prostate carcinoma cell lines (PC3, DU145 and LNCaP) for 48 h. The mean  $\pm$  standard deviations are shown.
